# Supplementary material for: A solidified floating organic drop-dispersive liquid–liquid microextraction based on in situ formed fatty acid-based deep eutectic solvents for the extraction of benzophenone-UV filters from water samples
Source: Royal Society of Chemistry journal article supplement (doi:10.1039/d1nj01393a), 2021-01-01
Supplement: d1nj01393a1.pdf [file d1nj01393a1.pdf]

## Supporting Information

**A solidified floating organic drop-dispersive liquid-liquid microextraction based  
on in-situ formed fatty acid-based deep eutectic solvents for extraction of  
benzophenone-UV filters from water samples**

Huazi Wang <sup>a,b</sup>, Qinqin Xu <sup>a</sup>, Jinglong Jiao <sup>a</sup>, Hai Wu <sup>a,c\*</sup>

<sup>a</sup> School of Chemistry & Materials Engineering, Fuyang Normal University, Fuyang, Anhui 236037, PR China.

<sup>b</sup> Anhui Provincial Technology and Engineering Research Center for Biomass Conversion and Pollution Prevention and Control, Fuyang, Anhui 236037, PR China.

<sup>c</sup> Anhui Province Key Laboratory of Environmental Hormone and Reproduction, Fuyang, Anhui 236037, PR China.

\* Corresponding authors. Tel.: +86 558 2596249; Fax: +86 558 2596249.

*E-mail addresses:* wuhai317@126.com

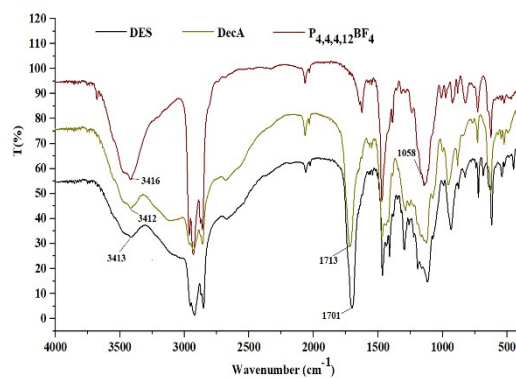

**Fig. S1** FTIR spectra of  $P_{4,4,4,12}BF_4$ , DecA and DES ( $P_{4,4,4,12}BF_4$ : DecA).

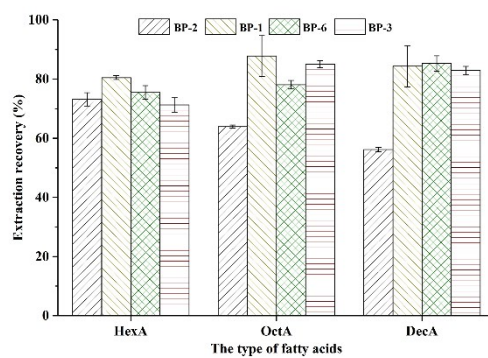

**Fig. S2** Effect of the type of fatty acids. Extraction conditions: 8 mL of sample solution, 1 mL of fatty acid sodium solution, 100  $\mu\text{L}$  of  $P_{4,4,4,12}Br$ , 100  $\mu\text{L}$  of  $\text{NaBF}_4$ , 500  $\mu\text{L}$  of 2 mol  $\text{L}^{-1}$   $\text{H}_2\text{SO}_4$ , 45  $^\circ\text{C}$  solution temperature.

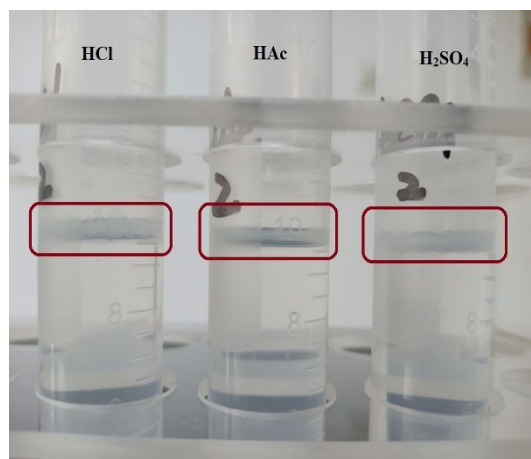

**Fig. S3** Comparison of the solidification effect of the final DES phase using HCl, HAc and H<sub>2</sub>SO<sub>4</sub>.

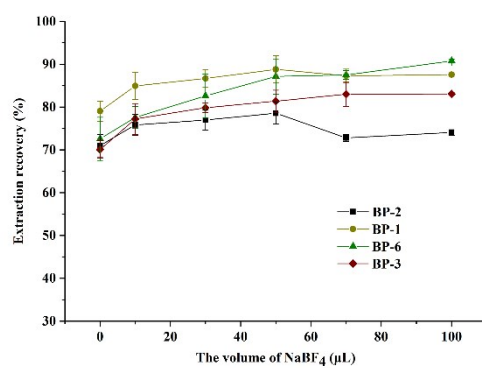

**Fig. S4** Effect of the volume of NaBF<sub>4</sub> solution. Extraction conditions: 8 mL of sample solution, 400 μL of DecA-Na, 100 μL of P<sub>4,4,4,12</sub>Br, 300 μL of 2 mol L<sup>-1</sup> H<sub>2</sub>SO<sub>4</sub>, 45 °C solution temperature.

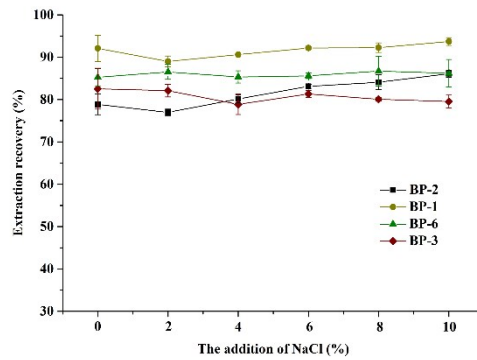

**Fig. S5** Effect of salt addition. Extraction conditions: 8 mL of sample solution, 400  $\mu$ L of DecA-Na, 100  $\mu$ L of  $P_{4,4,4,12}Br$ , 50  $\mu$ L of  $NaBF_4$ , 300  $\mu$ L of 2 mol  $L^{-1}$   $H_2SO_4$ .

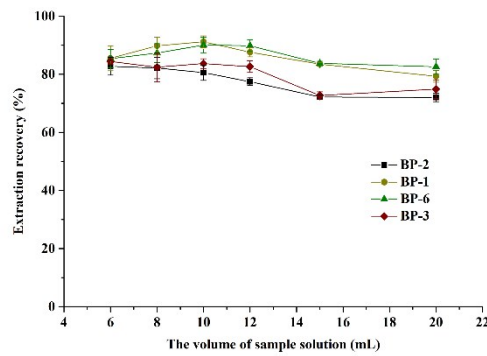

**Fig. S6** Effect of sample volume. Extraction conditions: 400  $\mu$ L of DecA-Na, 100  $\mu$ L of  $P_{4,4,4,12}Br$ , 50  $\mu$ L of  $NaBF_4$ , 300  $\mu$ L of 2 mol  $L^{-1}$   $H_2SO_4$ .

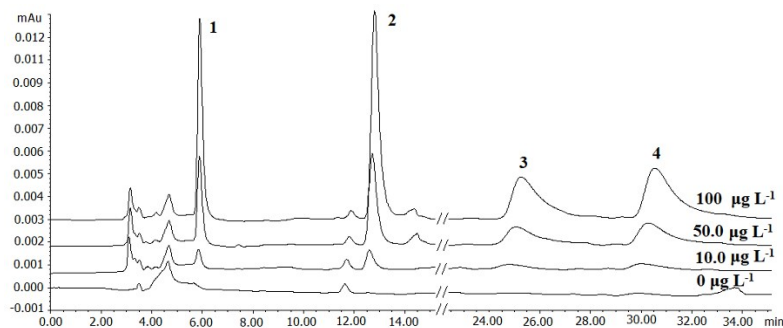

**Fig. S7** The HPLC chromatograms of BP-UV filters in the blank and spiked (spiked with 0, 10.0, 50.0 and 100  $\mu$ g  $L^{-1}$ , respectively) tap water: 1. BP-2; 2. BP-1; 3. BP-6; 4. BP-3.

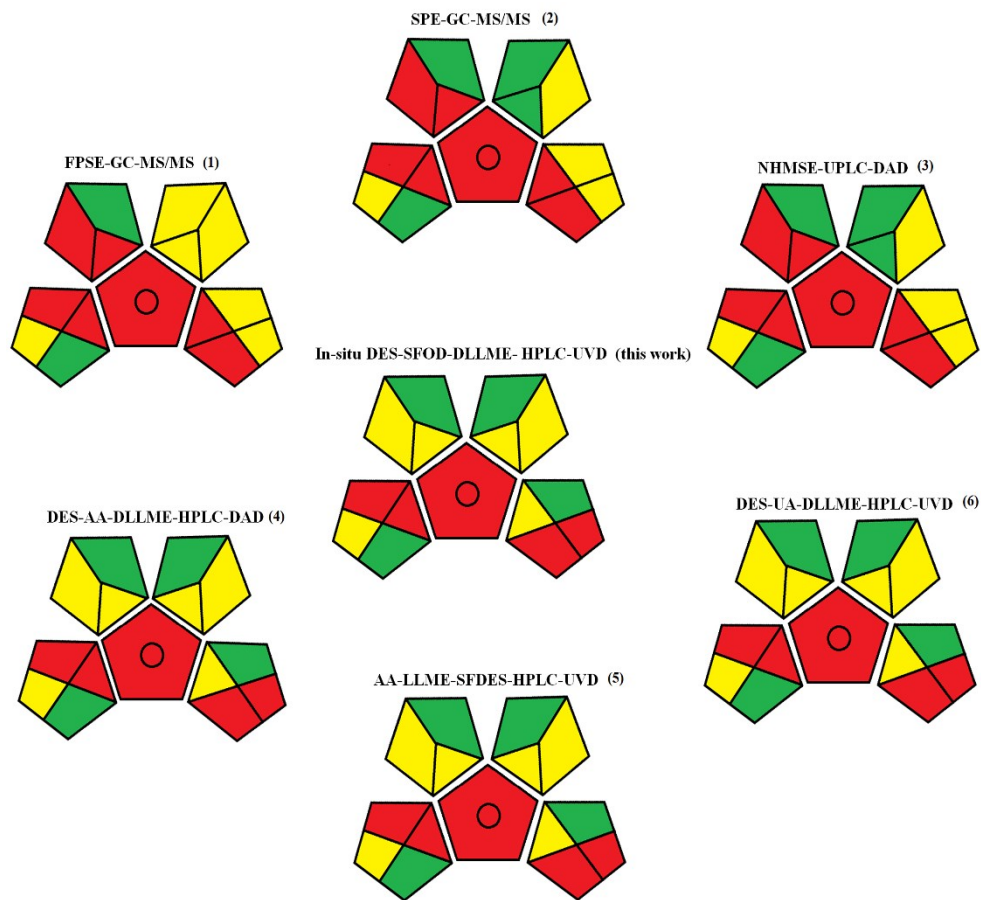

**Fig. S8** Greenness assessment of the developed and reported methods for the determination of UV filters by GAPI approach.

Table S1 Comparison of the proposed method with reported methods for the extraction of UV

filters.

| Method                                   | Extraction medium                                     | UV filters                                                  | Sample                                               | Organic solvents in extraction process                            | Main operation time                                                                            | Analytical range ( $\mu\text{g L}^{-1}$ ) | LOD ( $\text{ng L}^{-1}$ )      | Reference |
|------------------------------------------|-------------------------------------------------------|-------------------------------------------------------------|------------------------------------------------------|-------------------------------------------------------------------|------------------------------------------------------------------------------------------------|-------------------------------------------|---------------------------------|-----------|
| FPSE <sup>a</sup> -GC-MS/MS (1)          | Sol-gel PDMS-FPSE                                     | EHS, BS, HMS, BP-3, IAMC, 4MBC, MA, ETO, 2EHMC, EHPABA, OCR | Lake, river, seawater, swimming-pool water           | 2 mL of methanol/acetonitrile (50:50, v/v), 1 mL of ethyl acetate | 8 min of immersing, 20 min of magnetic stirring, 3 min of desorption                           | 0.2-200, 0.55-200, 0.5-200, 1-200         | 0.013-4.5 $\text{ng L}^{-1}$    | 10        |
| SPE <sup>b</sup> -GC-MS/MS (2)           | MIL-101                                               | EHS, BS, HMS, BP-3, IAMC, 4MBC, MA, ETO, 2EHMC, OCR         | Mineral, river, wastewater, swimming-pool, sea water | 3.2 mL of ethyl acetate                                           | 20 min of conditioning, eluting, and redissolving                                              | 0.5-100                                   | 1.0-11.7 $\text{ng L}^{-1}$     | 7         |
| NHMSE <sup>c</sup> -UPLC-DAD (3)         | Hybrid monolith                                       | BP-2, BP-1, 4-hydroxybenzophenone, BP-8, BP-3               | Swimming-pool water, human urine                     | 300 $\mu\text{L}$ of methanol, 150 $\mu\text{L}$ of mobile phase  | 150 min of stirring at 1100 rpm, 5 min of stirring at 1100 rpm                                 | 5-500                                     | 1-10 $\mu\text{g L}^{-1}$       | 44        |
| DES-AA-DLLME <sup>d</sup> -HPLC-DAD (4)  | DES (DL-menthol: decanoic acid = 1:1)                 | 4OH-BP, BP-1, BP, BP-3, BP-2, BP-6                          | Swimming-pool, river water                           | 100 $\mu\text{L}$ of DES                                          | Pull into and push out using a 10 mL glass syringe (repeated 5 times), 5 min of centrifugation | 0.5-1000                                  | 0.05-0.2 $\mu\text{g L}^{-1}$   | 34        |
| AA-LLME-SFDES <sup>e</sup> -HPLC-UVD (5) | DES (decanoic acid: dodecanoic acid = 2:1)            | BP-1, BP, BP-3, PS, BS                                      | Swimming-pool, well, river water                     | 65 $\mu\text{L}$ of DES, 100 $\mu\text{L}$ of methanol            | Pull into and push out using a 1 mL pipette (repeated 6 times, <10 s), 3 min of ice-water bath | 0.15-400, 1.5-400, 0.50-400, 2.0-800      | 0.045-0.54 $\mu\text{g L}^{-1}$ | 35        |
| DES-UA-DLLME <sup>f</sup> -HPLC-UVD (6)  | DES (N <sub>8,8,8,1</sub> Cl: decanoic acid = 1:3)    | BP-1, BP, BP-3                                              | Swimming-pool, river water                           | 30 mg DES + 80 $\mu\text{L}$ of methanol                          | 5 min of sonication, 4 min of centrifugation                                                   | 0.5-500, 1-500                            | 0.15-0.30 $\mu\text{g L}^{-1}$  | 33        |
| In-situ DES-SFOD-DLLME-HPLC-UVD          | DES (P <sub>4,4,4,12</sub> Br: decanoic acid = 1:9.4) | BP-2, BP-1, BP-6, BP-3                                      | River, tap, bottled mineral and vitamin water        | 200 $\mu\text{L}$ of methanol                                     | 5 min of centrifugation, 5 min of ice bath                                                     | 2.00-500, 5.00-500                        | 0.600-1.50 $\mu\text{g L}^{-1}$ | This work |

a. Fabric phase sorptive extraction;

b. Solid-phase extraction;

c. Nanostructured hybrid monolith stirring extraction;

d. Air-assisted dispersive liquid-liquid microextraction based on a new hydrophobic deep eutectic solvent;

e. Air-assisted liquid-liquid microextraction based on solidification of floating deep eutectic solvent;

f. Deep eutectic solvent-based ultrasound-assisted dispersive liquid-liquid microextraction.
